# Supplementary material for: A simple and effective preparation of quercetin pentamethyl ether from quercetin
Source: publisher site journal article supplement (doi:10.3762/bjoc.14.291), 2018-12-28
Supplement: Additional file 1 [file 1860-5397-14-291-S1.pdf]

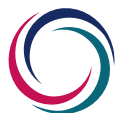

## Supporting Information

for

### **A simple and effective preparation of quercetin pentamethyl ether from quercetin**

Jin Tatsuzaki, Tomohiko Ohwada, Yuko Otani, Reiko Inagi and Tsutomu Ishikawa

*Beilstein J. Org. Chem.* **2018**, *14*, 3112–3121. [doi:10.3762/bjoc.14.291](https://doi.org/10.3762/bjoc.14.291)

### **Experimental procedures, $^1\text{H}$ and $^{13}\text{C}$ NMR assignments of methylated products 3, 4 and 5 and references**

|                                                                                                                                                                                           |    |
|-------------------------------------------------------------------------------------------------------------------------------------------------------------------------------------------|----|
| General                                                                                                                                                                                   | S2 |
| Reaction with MeI/K <sub>2</sub> CO <sub>3</sub> /DMF (run 1 in Table 1)                                                                                                                  | S2 |
| Reaction with MeI/K <sub>2</sub> CO <sub>3</sub> /acetone (run 2 in Table 1)                                                                                                              | S2 |
| Reaction with Me <sub>2</sub> SO <sub>4</sub> /K <sub>2</sub> CO <sub>3</sub> /acetone (run 3 in Table 1)                                                                                 | S2 |
| Reaction with MeI/NaH/DMF (run 4 in Table 1)                                                                                                                                              | S3 |
| Reaction with Me <sub>2</sub> SO <sub>4</sub> /10% NaOH/CH <sub>2</sub> Cl <sub>2</sub> /Bn(Et) <sub>3</sub> NCl (run 1 in Table 2)                                                       | S3 |
| Reaction with Me <sub>2</sub> SO <sub>4</sub> /NaOH/DMSO (run 3 in Table 2)                                                                                                               | S3 |
| Reaction with MeI/KOH/DMSO                                                                                                                                                                | S3 |
| <sup>1</sup> H and <sup>13</sup> C NMR assignments of quercetin trimethyl ether [5-hydroxy-2-(3-hydroxy-4-methoxyphenyl)-3,7-dimethoxy-4 <i>H</i> -1-benzopyran-4-one] ( <b>3</b> )       | S4 |
| <sup>1</sup> H and <sup>13</sup> C NMR assignments of quercetin tetramethyl ether [5-hydroxy-3,7-dimethoxy-2-(3,4-dimethoxyphenyl)-4 <i>H</i> -1-benzopyran-4-one] ( <b>4</b> )           | S4 |
| <sup>1</sup> H and <sup>13</sup> C NMR assignments of 6-methylquercetin pentamethyl ether [2-(3,4-dimethoxyphenyl)-3,5,7-trimethoxy-6-methyl-4 <i>H</i> -1-benzopyran-4-one] ( <b>5</b> ) | S4 |
| References                                                                                                                                                                                | S5 |

**General** Melting points were determined with a melting point hot-stage instrument and are uncorrected. ESI mass spectra were obtained using a time-of-flight mass spectrometer.  $^1\text{H}$  and  $^{13}\text{C}$  NMR spectra were recorded at 400 and 100 MHz, respectively, in  $\text{CDCl}_3$ . Chemical shifts were calibrated with internal tetramethylsilane or with the solvent peak for the  $^1\text{H}$  and  $^{13}\text{C}$  NMR spectra. The following abbreviations are used: s = singlet, d = doublet, t = triplet, q = quartet, dd = double doublet, m = multiplet, and br = broad. For preparative TLC PLC Silica gel 60  $\text{F}_{254}$  (1 or 2 mm) was used. Reaction mixture was extracted with ethyl acetate (EtOAc), and organic solutions obtained were washed with  $\text{H}_2\text{O}$  followed by brine and evaporated under reduced pressure after drying over  $\text{MgSO}_4$ , unless otherwise noted.

**Reaction with MeI/ $\text{K}_2\text{CO}_3$ /DMF (run 1 in Table 1)** According to the reported conditions [1] a suspension of quercetin (**2**) (0.146 g,  $4.8 \times 10^{-4}$  mol),  $\text{K}_2\text{CO}_3$  (0.418 g,  $30 \times 10^{-4}$  mol), and MeI (0.5 g,  $35 \times 10^{-4}$  mol) in DMF (1.3 mL) was stirred at 35 °C for 24 h. After quenched with  $\text{H}_2\text{O}$  and acidified with 20%  $\text{H}_2\text{SO}_4$  (pH ca 5) the mixture was extracted. Purification of the residue (0.157 g) by preparative TLC ( $\text{CHCl}_3$ ) afforded quercetin tetramethyl ether **4** ( $R_f$  = 0.30-0.56, 0.084 g, 49%), quercetin trimethyl ether **3** ( $R_f$  = 0.12–0.24, 0.036 g, 22%), and quercetin pentamethyl ether **1** ( $R_f$  = 0.02–0.12, 0.039 g, 21%).

**Reaction with MeI/ $\text{K}_2\text{CO}_3$ /acetone (run 2 in Table 1)** According to the reported conditions [2] a suspension of **2** (0.156 g,  $5.2 \times 10^{-4}$  mol),  $\text{K}_2\text{CO}_3$  (0.218 g,  $15.8 \times 10^{-4}$  mol), and MeI (0.5 g,  $35 \times 10^{-4}$  mol) in acetone (2.5 mL) was stirred under reflux for 24 h. After quenched with  $\text{H}_2\text{O}$  and acidified with 20%  $\text{H}_2\text{SO}_4$  (pH ca 5) the mixture was centrifuged. The insoluble residue was washed with  $\text{H}_2\text{O}$  followed by acetone to recover **2** (0.134 g, 86%).

**Reaction with  $\text{Me}_2\text{SO}_4$ / $\text{K}_2\text{CO}_3$ /acetone (run 3 in Table 1)** According to the reported conditions [3] a suspension of **2** (0.151 g,  $5.0 \times 10^{-4}$  mol),  $\text{K}_2\text{CO}_3$  (2.3 g,  $166 \times 10^{-4}$  mol), and  $\text{Me}_2\text{SO}_4$  (0.6 mL,  $63 \times 10^{-4}$  mol) in acetone (23 mL) was refluxed for 23 h under stirring. After addition of acetone the insoluble material was filtered off and washed with acetone. The

filtrate and the washings were combined and evaporated to give **1** (0.166 g, 89%), which was recrystallized from acetone.

**Reaction with MeI/NaH/DMF (run 4 in Table 1)** According to the reported conditions [4] a mixture of **2** (0.149 g,  $4.9 \times 10^{-4}$  mol), NaH (0.052 g,  $22 \times 10^{-4}$  mol), and MeI (0.5 mL,  $80 \times 10^{-4}$  mol) in DMF (10 mL) was stirred at rt for 21 h. After quenched with H<sub>2</sub>O the mixture was extracted. Purification of the residue (0.166 g) by preparative TLC (CHCl<sub>3</sub> : EtOAc = 8 : 1, v/v) afforded **3** (R<sub>f</sub> = 0.34–0.65, 0.068 g, 39%) as a main product.

**Reaction with Me<sub>2</sub>SO<sub>4</sub>/10% NaOH/CH<sub>2</sub>Cl<sub>2</sub>/Bn(Et)<sub>3</sub>NCl (run 1 in Table 2)** A mixture of **2** (0.50 g,  $1.65 \times 10^{-3}$  mol), Bn(Et)<sub>3</sub>NCl (0.04 g,  $0.18 \times 10^{-3}$  mol), and Me<sub>2</sub>SO<sub>4</sub> (0.94 mL,  $9.9 \times 10^{-3}$  mol) in CH<sub>2</sub>Cl<sub>2</sub> (5 mL) and 10% NaOH aq solution (4 mL) was stirred at rt for 5 h. After quenched with H<sub>2</sub>O and acidified with 20% H<sub>2</sub>SO<sub>4</sub> (pH ca 5) the mixture was extracted. Purification of the residue (0.597 g) by preparative TLC (CHCl<sub>3</sub>) afforded **4** (R<sub>f</sub> = 0.12–0.24, 0.274 g, 46%) and **1** (R<sub>f</sub> = 0.02–0.12, 0.193 g, 31%).

**Reaction with Me<sub>2</sub>SO<sub>4</sub>/NaOH/DMSO (run 3 in Table 2)** To a stirred suspension of powdered NaOH (0.22 g,  $5.5 \times 10^{-3}$  mol) in DMSO (1 mL) was slowly added **2** (0.20 g,  $6.7 \times 10^{-4}$  mol) followed by Me<sub>2</sub>SO<sub>4</sub> (0.6 mL,  $6.3 \times 10^{-3}$  mol) at rt and the resulting mixture was stirred at rt for 2 h. After quenched with H<sub>2</sub>O (10 mL) the insoluble material was filtered and washed with H<sub>2</sub>O (to pH ca 7) to give **1** (0.17 g, 66%).

**Reaction with MeI/KOH/DMSO** To a stirred suspension of powdered KOH (0.83 g,  $14.8 \times 10^{-3}$  mol) in DMSO (4 mL) was slowly added **2** (0.51 g,  $1.67 \times 10^{-3}$  mol) followed by MeI (0.9 mL,  $14.5 \times 10^{-3}$  mol) at rt and the resulting suspension was stirred at rt for 1.5 h. After quenched with H<sub>2</sub>O and acidified with 20% H<sub>2</sub>SO<sub>4</sub> (pH ca 5) the mixture was extracted. The organic solutions were washed with 5% NaHCO<sub>3</sub> aq, H<sub>2</sub>O and brine. Trituration of the residue (0.492 g) obtained with acetone afforded **1** (0.394 g) as off-white powder. Purification of the mother liquor by preparative TLC (CHCl<sub>3</sub>/EtOAc = 5:1, v/v) afforded **5** (R<sub>f</sub> = 0.34–0.48, 0.007 g, 1%) and an additional **1** (R<sub>f</sub> = 0.14–0.28, 0.024 g; total 0.418 g, 67%).

On **5**: mp 158–160 °C; ESI–MS:  $m/z$  387.1435 (calcd. for  $C_{21}H_{23}O_7^+$ : 387.1438). Anal. Calcd for  $C_{21}H_{22}O_7$ : C, 65.28; H, 5.74; Found: C, 65.25; H, 6.02.

**$^1H$  and  $^{13}C$  NMR assignments of quercetin trimethyl ether [5-hydroxy-2-(3-hydroxy-4-methoxyphenyl)-3,7-dimethoxy-4*H*-1-benzopyran-4-one]**

**(3)**  $^1H$  NMR (DMSO- $d_6$ )  $\delta$  3.81 (3H, s, OMe), 3.867 (3H, s, OMe), 3.873 (3H, s, OMe), 6.37 (1H, d,  $J$  = 2.0 Hz, 6- or 8-H), 6.72 (1H, d,  $J$  = 2.0 Hz, 6- or 8-H), 7.11 (1H, d,  $J$  = 9.2 Hz, 5'-H), 7.58 (1H, dd,  $J$  = 9.2, 2.2 Hz, 6'-H), 7.59 (1H, d,  $J$  = 2.2 Hz, 2'-H), 9.44 (1H, s, OH), 12.65 (1H, s, OH);  $^{13}C$  NMR (DMSO- $d_6$ )  $\delta$  55.7, 56.1, 59.7, 92.3, 97.8, 105.2, 111.9, 115.1, 120.4, 122.2, 138.2, 146.4, 150.3, 155.6, 156.3, 160.9, 165.2, 178.1.

**$^1H$  and  $^{13}C$  NMR assignments of quercetin tetramethyl ether [5-hydroxy-3,7-dimethoxy-2-(3,4-dimethoxyphenyl)-4*H*-1-benzopyran-4-one] **(4)****

$^1H$  NMR  $\delta$  3.87 (3H, s, OMe), 3.88 (3H, s, OMe), 3.97 (3H, s, OMe), 3.98 (3H, s, OMe), 6.35 (1H, d,  $J$  = 2.4 Hz, 6- or 8-H), 6.44 (1H, d,  $J$  = 2.4 Hz, 6- or 8-H), 6.99 (1H, d,  $J$  = 8.4 Hz, 5'-H), 7.69 (1H, d,  $J$  = 2.4 Hz, 6'-H), 7.73 (1H, dd,  $J$  = 8.4, 2.4 Hz, 6'-H), 12.57–12.62 (1H, br, OH);  $^{13}C$  NMR  $\delta$  56.0, 56.1, 56.2, 60.3, 92.4, 98.0, 106.2, 111.0, 111.5, 122.3, 123.1, 139.1, 148.9, 151.5, 156.0, 156.9, 162.2, 165.6, 178.9.

**$^1H$  and  $^{13}C$  NMR assignments of 6-methylquercetin pentamethyl ether [2-(3,4-dimethoxyphenyl)-3,5,7-trimethoxy-6-methyl-4*H*-1-benzopyran-4-one] **(5)****

$^1H$  NMR  $\delta$  2.18 (3H, s, CMe), 3.86 (3H, s, 3-OMe), 3.90 (3H, s, 5-OMe), 3.93 (3H, s, 7-OMe), 3.97 (3H, s, 3'-OMe), 3.97 (3H, s, 4'-OMe), 6.69 (1H, s, 8-H), 6.98 (1H, d,  $J$  = 8.8 Hz, 5'-H), 7.70–7.73 (2H, m, 2'- and 6'-H);  $^{13}C$  NMR  $\delta$  8.1 (CMe), 55.9 (7-OMe), 56.0 (3'- or 4'-OMe), 59.9 (3'- or 4'-OMe), 61.5 (5-OMe), 94.6 (C8), 110.7 (C5'), 111.2 (C2'), 112.4 (C4a), 118.1 (C6), 121.6 (C6'), 123.4 (C1'), 141.0 (C3), 148.6 (C3'), 150.8 (C4'), 153.0 (C2), 156.4 (C8a), 157.5 (C5), 162.2 (C7), 173.4 (C4).

## References

1. Pan, G.; Yang, K.; Ma, Y.; Zhao, X.; Lu, K.; Yu, P. *Bull. Korean Chem. Soc.* **2015**, 36, 1460-1466.
2. Juvalé, K.; Stefan, K.; Wiese, M. *Eur. J. Med. Chem.* **2013**, 67, 115-126.
3. Picq, M.; Prigent, A. F.; Némóz, G.; André, A. C.; Pacheco, H. *J. Med. Chem.* **1982**, 25, 1192-1198.
4. Matsuda, H.; Morikawa, T.; Toguchida, I.; Yoshikawa M. *Chem. Pharm. Bull.* **2002**, 50, 788-795.
